# Supplementary material
Source: PubMed Central journal article supplement (PMC3774536)
Supplement: NIHMS502168-supplement-2.pdf [file NIHMS502168-supplement-2.pdf]

# VANGUARD Microarray Study

Li Shen, Jing Wang, and Kevin R. Coombes  
Dept. of Bioinformatics and Computational Biology  
The University of Texas M.D. Anderson Cancer Center (MDACC)

25 February 2011

## Contents

|          |                                                |           |
|----------|------------------------------------------------|-----------|
| <b>1</b> | <b>Executive Summary</b>                       | <b>1</b>  |
| 1.1      | Statistical Methods . . . . .                  | 1         |
| 1.2      | Results . . . . .                              | 2         |
| <b>2</b> | <b>Loading the Data</b>                        | <b>2</b>  |
| 2.1      | R Packages . . . . .                           | 2         |
| 2.2      | Affymetrix data . . . . .                      | 3         |
| 2.3      | Gene/Probe Annotations . . . . .               | 4         |
| 2.4      | Clinical Data . . . . .                        | 4         |
| <b>3</b> | <b>Statistical Modeling</b>                    | <b>7</b>  |
| 3.1      | Relative Importance of Fixed Effects . . . . . | 9         |
| 3.2      | Interaction Between Time and Site . . . . .    | 10        |
| 3.3      | Random Effects . . . . .                       | 15        |
| <b>4</b> | <b>Batch Correction</b>                        | <b>17</b> |
| 4.1      | Genes That Are Different By Site . . . . .     | 17        |
| 4.2      | Genes That Change Over Time . . . . .          | 22        |

## 1 Executive Summary

### 1.1 Statistical Methods

Microarray data were processed using the RMA algorithm as implemented in the `aroma.affymetrix` package of R. We use a mixed-effects model on the processed data to understand the expression patterns of each gene. the fixed effects represent

- Batch: array data were collected (over time) in two batches from two different laboratories. This effect is a nuisance and not one we really want to use to make inferences.

- DetMap: This is a detailed map of the site where each (bronchial brushing) sample was obtained. There are four levels of this variable, basically corresponding to its distance from the site of the primary tumor. The levels are ADJ (adjacent to the tumor), NON-ADJ (same half of the lung but not adjacent to the tumor), MC (main carina), and CONTRA (from the contralateral lung).
- Time.point: Samples were collected at four time points (0, 12, 24, or 36 months).
- We also allow an interaction term between DetMap and Time.point.

Random effects primarily account for the fact that we have multiple samples from the same patient (Case). We try to fit a model that includes a different starting point and slope over time for each case. For some probes, we are unable to fit a model that includes different slopes for each patient; in this case, we fall back to a single (base-level) random effect for each case.

## 1.2 Results

- Batch is a dominant effect on gene expression (**Figure 1**).
- After adjusting for batch (as part of the mixed-effects model), both site and time are significant in some genes, with site more important than time (**Figure 1**).
- There is very weak (and perhaps no real) evidence that the interaction term is ever significant (**Figure 1, Figure 3**).

## 2 Loading the Data

### 2.1 R Packages

We start by loading the packages that will be needed for our analysis.

```
> require(nlme)
> library(lattice)
> library(RColorBrewer)
> library(ClassComparison)
> library(ClassDiscovery)
```

by using `mclust`, invoked on its own or through another package, you accept the license agreement in the `mclust LICENSE` file and at <http://www.stat.washington.edu/mclust/license.txt>

We modify some of the default display options for the trellis/lattice plots.

```
> x <- trellis.par.get("plot.symbol")
> x$pch <- 16
> x$col <- "#00aa60"
> trellis.par.set("plot.symbol", x)
> rm(x)
```

## 2.2 Affymetrix data

The processed Affymetrix data can be found in the following location:

```
> basedir <- ifelse(.Platform$OS == "windows", "//mdadqsfs02", "/data")
> datadir <- file.path(basedir, "bioinfo2", "Lung-HN", "Wistuba-VANGUARD",
+   "Analysis")
```

Here we load the data.

```
> load(file.path(datadir, "gExpr-RMA-Aroma.RData"))
```

In order to understand what is contained in the dataset, we explore the objects that we just loaded.

```
> ls()

[1] "basedir" "datadir" "gExpr"    "normData" "si"

> class(gExpr)

[1] "data.frame"

> dim(gExpr)

[1] 33252  396

> class(normData)

[1] "data.frame"

> dim(normData)

[1] 33252  391

> normData <- as.matrix(normData)
> class(si)

[1] "data.frame"

> dim(si)

[1] 391  61

> all(colnames(normData) == rownames(si))

[1] TRUE
```

### 2.3 Gene/Probe Annotations

Here we load the annotations for the probes on the ST 1.0 array.

```
> annot <- read.csv(file.path(datadir, "RNW",
+                          "Human Gene 1.0 ST annotations for Li Shen.csv"),
+                  header=TRUE, as.is=TRUE, na.strings=c("NA", "Un", ""),
+                  row.names=1)
> all(rownames(normData) %in% rownames(annot))
```

```
[1] TRUE
```

```
> annot <- annot[rownames(normData),]
> annot$Symbol <- factor(annot$Symbol)
> annot$UGCluster <- factor(annot$UGCluster)
> annot$Chromosome <- factor(annot$Chromosome,
+                            levels=c(1:22, "X", "Y"))
> annot$Cytoband <- factor(annot$Cytoband)
> summary(annot)
```

| Name             | Accession        | UGCluster      | Symbol           |
|------------------|------------------|----------------|------------------|
| Length:33252     | Length:33252     | Hs.559040: 26  | LOC349196: 26    |
| Class :character | Class :character | Hs.199343: 13  | DUX4 : 12        |
| Mode :character  | Mode :character  | Hs.196086: 12  | FAM90A1 : 12     |
|                  |                  | Hs.460179: 12  | MGC72080 : 12    |
|                  |                  | Hs.553518: 12  | SMG1 : 12        |
|                  |                  | (Other) :21386 | (Other) :21697   |
|                  |                  | NA's :11791    | NA's :11481      |
| EntrezID         | Chromosome       | Cytoband       | GO               |
| Min. : 1         | 1 : 2241         | 6p21.3 : 356   | Length:33252     |
| 1st Qu.: 7166    | 19 : 1442        | 19p13.3: 210   | Class :character |
| Median : 51585   | 2 : 1385         | 16p13.3: 203   | Mode :character  |
| Mean : 1588044   | 11 : 1374        | 19p13.2: 170   |                  |
| 3rd Qu.: 124778  | 6 : 1355         | Xq28 : 133     |                  |
| Max. :100499221  | (Other):13971    | (Other):20629  |                  |
| NA's : 11481     | NA's :11484      | NA's :11551    |                  |

### 2.4 Clinical Data

Now we clean up the clinical data.

```
> si$Batch <- factor(si$Batch)
> si$Gender <- factor(si$Gender)
> si$Diagnosis..Histology. <- factor(si$Diagnosis..Histology.)
> colnames(si)[19] <- "Histology"
```

```

> si$Off.study_Reason <- factor(si$Off.study_Reason)
> si$Differentiation <- factor(si$Differentiation)
> si$Leison.Site <- factor(si$Leison.Site)
> si$Anatomical_site <- factor(si$Anatomical_site)
> si$site.of.collection <- factor(si$site.of.collection)
> si$Contralateral <- factor(si$Contralateral)
> dmlev <- c("ADJ", "NON-ADJ", "MC", "CONTRA")
> si$DetMap <- factor(si$DetMap, levels = dmlev)
> mlev <- c("ADJ", "NON-ADJ", "MC")
> si$Map <- factor(si$Map, levels = mlev)
> si$Code.4.time.point <- factor(si$Code.4.time.point)
> si$Code.4.Site.of.collection <- factor(si$Code.4.Site.of.collection)
> si$pT <- factor(si$pT)
> si$pN <- factor(si$pN)
> si$Final.Pat.Stage <- factor(si$Final.Pat.Stage)
> si$EGFR.status <- factor(si$EGFR.status)
> si$KRAS.status <- factor(si$KRAS.status)
> si$V_Case.ID.Inclusion_number. <- factor(paste("P", si$V_Case.ID.Inclusion_number.,
+      sep = ""))
> colnames(si)[8] <- "Case"
> simplify <- c(2, 8, 27, 31, 34, 12, 14:20, 22, 24, 43:47, 13)
> rm(dmlev, mlev)
> summary(si[, simplify])

```

| Batch              | Case             | DetMap      | Map              | Time.point       |
|--------------------|------------------|-------------|------------------|------------------|
| I : 71             | P1 : 25          | ADJ : 62    | ADJ : 62         | Min. : 0.00      |
| II:320             | P31 : 24         | NON-ADJ:107 | NON-ADJ:268      | 1st Qu.: 0.00    |
|                    | P40 : 24         | MC : 60     | MC : 60          | Median :12.00    |
|                    | P44 : 24         | CONTRA :161 | NA's : 1         | Mean :15.87      |
|                    | P6 : 24          | NA's : 1    |                  | 3rd Qu.:24.00    |
|                    | P18 : 23         |             |                  | Max. :36.00      |
|                    | (Other):247      |             |                  |                  |
|                    | Off.study_Reason | Gender      | DOB..DObirth.    | DOSurgery        |
|                    | : 17             | F:134       | Length:391       | Length:391       |
| N                  | :332             | M:257       | Class :character | Class :character |
| Y_died             | : 25             |             | Mode :character  | Mode :character  |
| Y_recurrence lung: | 17               |             |                  |                  |

| DOIInclusion     | Surgery          | Histology          | Differentiation |
|------------------|------------------|--------------------|-----------------|
| Length:391       | Length:391       | Adenocarcinoma:309 | MOD :180        |
| Class :character | Class :character | Squamous : 82      | MOD-POOR: 24    |

```

Mode :character   Mode :character           POOR   : 35
                                           W      : 42
                                           WELL   : 23
                                           NA's   : 87

```

```

Anatomical_site Contralateral   pT      pN      Final.Pat.Stage   EGFR.status
LLL: 58          : 1          1A :203  0:366  I : 23          MUT del E19: 18
LUL:102         CONTRA:161    1B : 43  1: 25  IA :221         WT           : 71
RLL: 80         IPSI  :169    2A : 98          IB : 98         NA's        :302
RML: 17         MC    : 60    2B : 24          IIA: 49
RUL:134                                     NA's: 23

```

```

      KRAS.status
MUT cod 12: 24
WT      : 65
NA's    :302

```

```

> tmp <- si[match(levels(as.factor(si$MRN)), si$MRN), c(8, 13)]
> tmp2 <- read.csv(file.path(datadir, "RNW", "Copy of VANGUARD_06012011_BRONCHIAL BRUSHES.csv"),
+   header = TRUE, as.is = TRUE, na.strings = c("NA", "Un", ""), row.names = "MDAH")
> ci <- data.frame(tmp, Event = tmp2[match(tmp$MRN, rownames(tmp2)),
+   "Event"])
> ci <- ci[order(ci$Case), ]
> rownames(ci) <- ci$Case
> Event.col <- rep("Suspicion", nrow(ci))
> Event.col[which(ci$Event == "YES")] <- "Recurrence"
> Event.col[which(ci$Event == "NO")] <- "No"
> ci <- cbind(ci, Event.col)
> ci <- ci[, c(1, 4)]
> foo <- merge(si, ci, by = "Case")
> for (i in 1:nrow(foo)) {
+   w <- which(si$Experiment.Names == foo[i, "Experiment.Names"])
+   if (length(w) != 1)
+     stop("no unique match")
+   rownames(foo)[i] <- rownames(si)[w]
+ }
> foo <- foo[rownames(si), ]
> foo <- foo[, c(colnames(si), "Event.col")]
> all(si[, 1:61] == foo[, 1:61])

```

```
[1] NA
```

```
> si <- foo
> rm(foo, ci, Event.col, tmp, tmp2, i, w)
```

These colors will be used in some of the later plots.

```
> ev.col <- c(No = "white", Recurrence = "black", Suspicion = "gray")
> ev.colors <- ev.col[as.character(si$Event.col)]
> hist.col <- c(Adenocarcinoma = "orange", Squamous = "purple")
> hist.colors <- hist.col[as.character(si$Histology)]
> batch.col <- c(I = "cyan", II = "magenta")
> batch.colors <- batch.col[as.character(si$Batch)]
> site.col <- brewer.pal(5, "Reds")[2:5]
> names(site.col) <- levels(si$DetMap)
> site.col <- c(ADJ = "red", `NON-ADJ` = "gold", MC = "green", CONTRA = "blue")
> site.colors <- site.col[as.numeric(si$DetMap)]
> time.col <- brewer.pal(5, "Blues")[2:5]
> names(time.col) <- seq(0, 36, 12)
> time.colors <- time.col[1 + round(si$Time.point/12)]
> case.col <- c(brewer.pal(3, "Reds"), brewer.pal(3, "Blues"), brewer.pal(3,
+ "Greens"), brewer.pal(3, "Purples"), brewer.pal(3, "Greys")[2:3],
+ brewer.pal(12, "Paired")[11], brewer.pal(9, "Set1")[6:7], brewer.pal(8,
+ "Dark2")[4], "#88e1e1")
> names(case.col) <- levels(si$Case)
> case.colors <- case.col[as.numeric(si$Case)]
> colorfac <- list(Case = list(fac = si$Case, col = case.col), Site = list(fac = si$DetMap,
+ col = site.col), Time = list(fac = factor(si$Time.point), col = time.col),
+ Batch = list(fac = si$Batch, col = batch.col), Histology = list(fac = si$Histology,
+ col = hist.col), Event = list(fac = si$Event.col, col = ev.col))
> cr <- colorRampPalette(c("white", brewer.pal(9, "Oranges")))
> tf <- function(x) x^0.15
```

### 3 Statistical Modeling

We use a mixed-effects model to understand the expression patterns of each gene. Fixed effects represent

- Batch: array data were collected (over time) in two batches from two different laboratories.
- DetMap: This is a detailed map of the site where each (bronchial brushing) sample was obtained. There are four levels of this variable, basically corresponding to its distance from the site of the primary tumor. The levels are ADJ (adjacent to the tumor), NON-ADJ (same half of the lung but not adjacent to the tumor), MC (main carina), and CONTRA (from the contralateral lung).

- Time.point: Samples were collected at four time points (0, 12, 24, or 36 months).
- We also allow an interaction term between DetMap and Time.point.

Random effects primarily account for the fact that we have multiple samples from the same patient (Case). We try to fit a model that includes a different starting point and slope over time for each case. For some genes, we are unable to fit a model that includes different slopes for each patient; in this case, we fall back to a single (base-level) random effect for each case.

```
> gene.label <- function(gene) {
+   ifelse(is.na(annot[gene, "Symbol"]), rownames(annot)[gene], as.character(annot[gene,
+     "Symbol"]))
+ }
> f <- "modlist.rda"
> if (file.exists(f)) {
+   load(f)
+ } else {
+   modlist <- lapply(1:nrow(normData), function(x) 1)
+   for (gene in 1:nrow(normData)) {
+     gl <- gene.label(gene)
+     cat(gl, "\n", file = stderr())
+     pinfo <- 1:nrow(si)
+     pclin <- si[pinfo, simplify]
+     x <- normData[gene, pinfo]
+     tempd <- data.frame(si[, c(2, 8, 27, 34, 19)], Y = x)
+     foo <- na.omit(tempd)
+     foo$Time.point <- foo$Time.point/12
+     foo <- foo[order(foo$Time.point, foo$Case), ]
+     gd <- groupedData(Y ~ Time.point | Case, data = foo, outer = ~Histology)
+     mod6 <- try(lme(Y ~ Batch + DetMap * Time.point, data = gd,
+       random = ~Time.point | Case, method = "ML"))
+     if (inherits(mod6, "try-error")) {
+       mod6 <- (lme(Y ~ Batch + DetMap * Time.point, data = gd,
+         random = ~1 | Case, method = "ML"))
+     }
+     modlist[[gene]] <- mod6
+   }
+   rm(gene, gl, pinfo, pclin, x, tempd, foo, gd, mod6)
+   save(modlist, file = f)
+ }
> rm(f)
```



### 3.1 Relative Importance of Fixed Effects

In the next block of code, we extract the  $p$ -values from the statistical models. To illustrate what we expect to get, we first show an example.

```
> x <- modlist[[1]]
> anova(x)
```

|                   | numDF | denDF | F-value  | p-value |
|-------------------|-------|-------|----------|---------|
| (Intercept)       | 1     | 363   | 7571.805 | <.0001  |
| Batch             | 1     | 363   | 17.882   | <.0001  |
| DetMap            | 3     | 363   | 0.185    | 0.9068  |
| Time.point        | 1     | 363   | 8.879    | 0.0031  |
| DetMap:Time.point | 3     | 363   | 2.944    | 0.0330  |

This example shows that we get separate  $p$ -values for each of the fixed effects included in the model, stored as the fourth column of the ANOVA table. So, we extract that column for each gene and save it.

```
> f <- "pvals.rda"
> if (file.exists(f)) {
+   load(f)
+ } else {
+   lap <- lapply(modlist, function(x) {
+     a <- anova(x)
+     a[, 4]
+   })
+   pvals <- matrix(unlist(lap), ncol = 5, byrow = TRUE)
+   a <- anova(modlist[[1]])
+   colnames(pvals) <- rownames(a)
+   rownames(pvals) <- rownames(normData)
+   pvals <- as.data.frame(pvals)
+   rm(lap, a, x)
+   save(pvals, file = f)
+ }
> rm(f)
```

We fit beta-uniform-mixture (BUM) models to the  $p$ -values for each of the four fundamental terms in the statistical model. We also plot histograms for the distributions of these  $p$ -values (**Figure 1**). It is clear that batch is an extremely large effect, being present in almost every gene. However, after adjusting for batch, both the site and the time produce clear signs of changing (for some genes) across the samples in a consistent manner, with site being slightly more important than time.

```
> bsite <- Bum(pvals$DetMap)
> countSignificant(bsite, alpha = 0.01)
```

```
[1] 1165

> btime <- Bum(pvals$Time.point)
> countSignificant(btime, alpha = 0.01)

[1] 348

> bbat <- Bum(pvals$Batch)
> countSignificant(bbat, alpha = 0.01)

[1] 25064

> binter <- Bum(pvals$"DetMap:Time.point")
> countSignificant(binter, alpha = 0.01)

[1] 0
```

### 3.2 Interaction Between Time and Site

Next, we would like to better understand the interaction term in the model. The histogram for the  $p$ -values associated with the interaction is a slightly odd shape, in that the standard BUM model clearly does not fit the distribution (**Figure 1**).

We start by asking whether the significance of site and time is correlated (tends to happen for the same genes) or independent. A smooth scatter plot of the logistically transformed  $p$ -values strongly suggests that they are independent (**Figure 2**). Directly counting the overlap at a 5% significance level agrees with this assessment.

```
> ss <- countSignificant(bsite, alpha = 0.05)
> ss

[1] 4686

> tt <- countSignificant(btime, alpha = 0.05)
> tt

[1] 1395

> observed <- sum(selectSignificant(bsite, alpha = 0.05) & selectSignificant(btime,
+   alpha = 0.05))
> expected <- ss * tt/nrow(normData)
> round(c(OBS = observed, EXP = expected))

OBS EXP
203 197
```

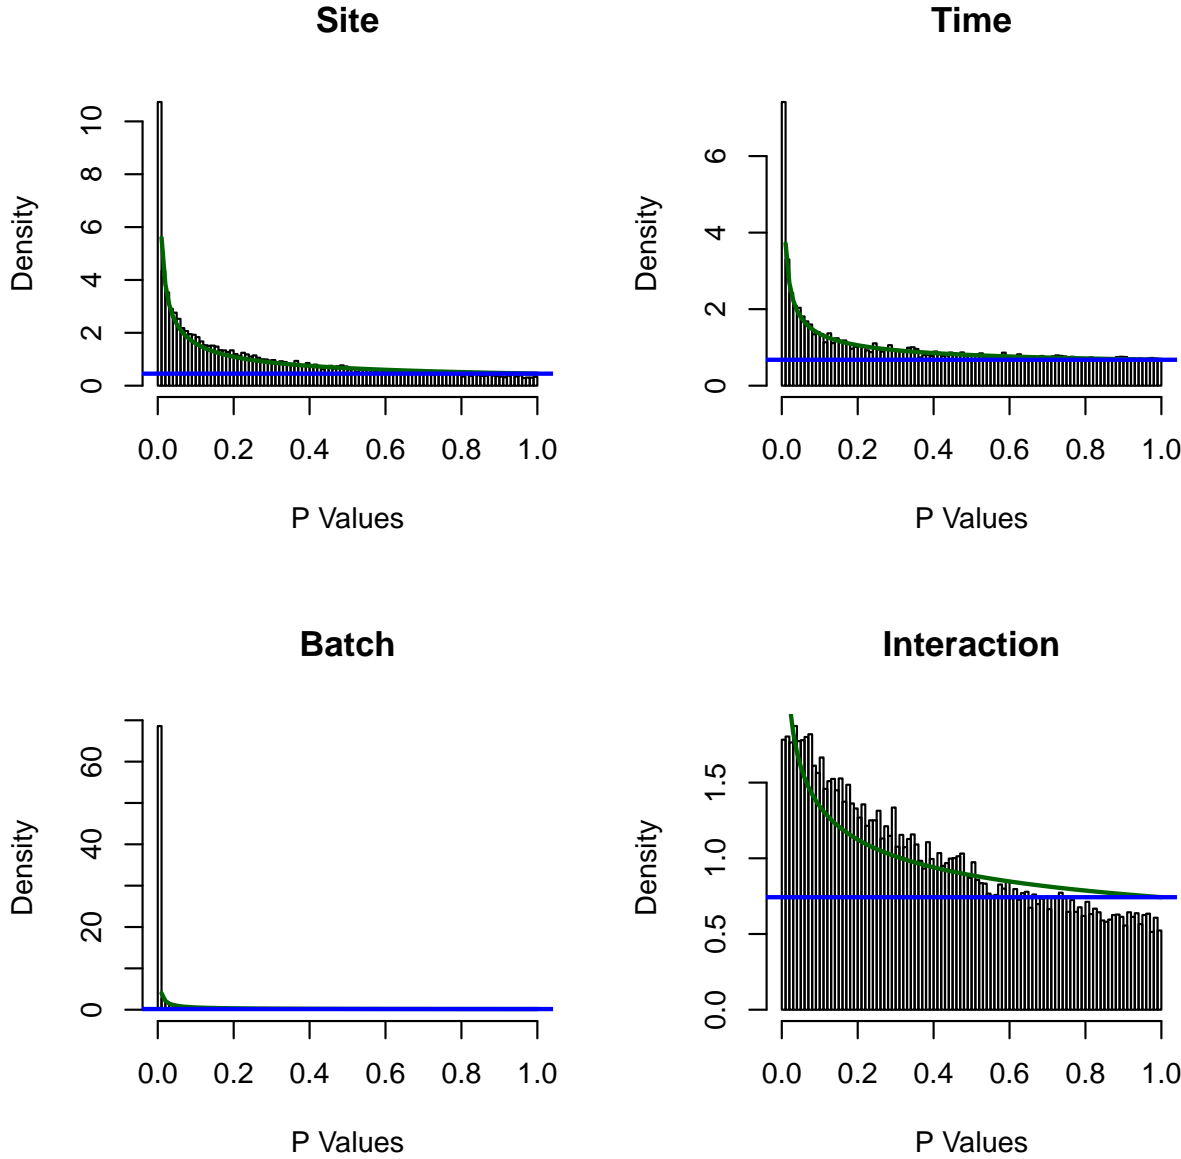

Figure 1: Histograms of p-values for the fixed effects.

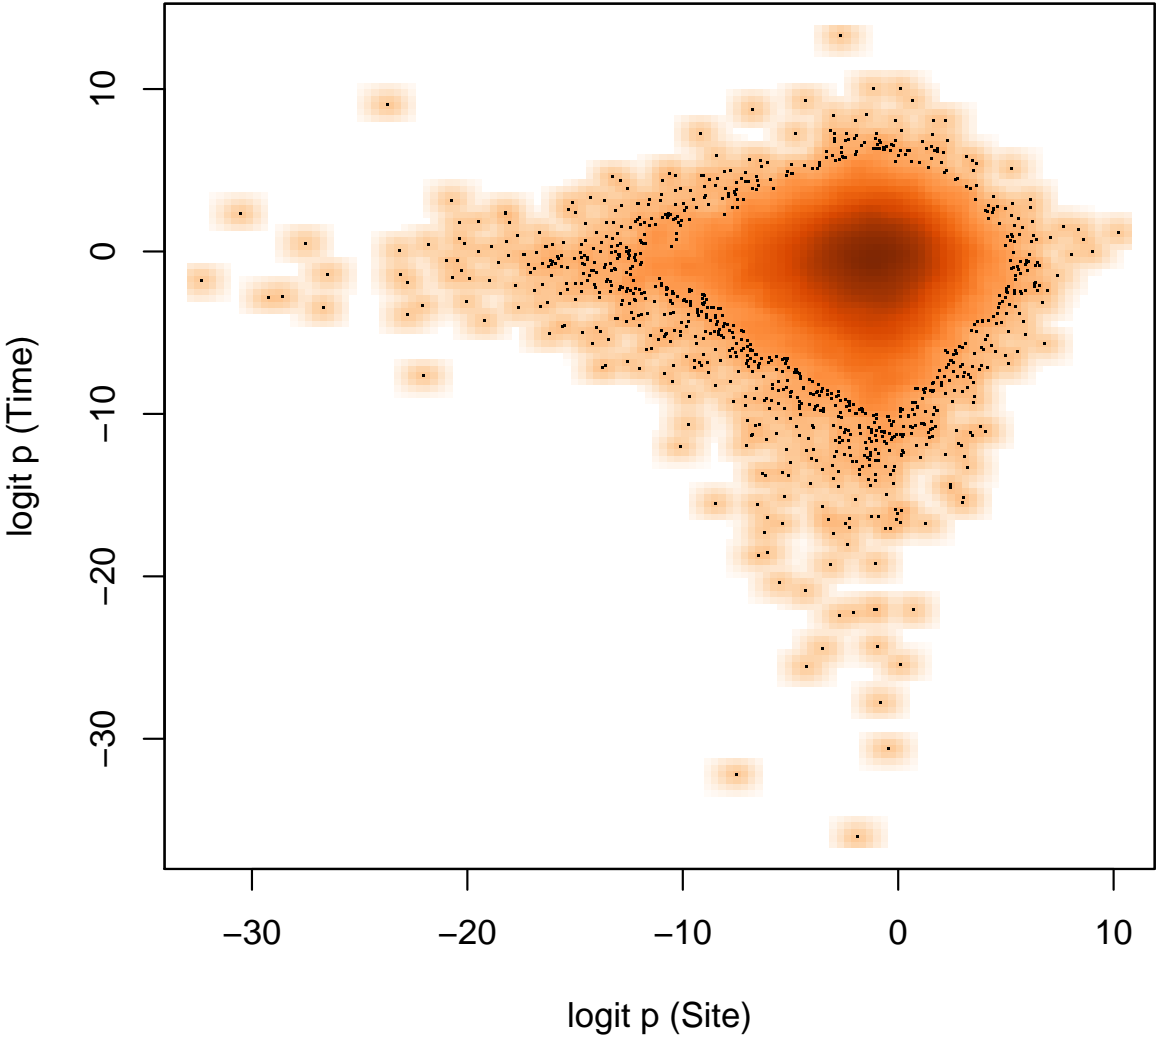

Figure 2: Smoothed scatter plot logistically transformed  $p$ -values from site and time.

Now we restrict to the set of genes where there is some very weak evidence that both time and site have significant effects. There are about 3000 probes for which both time and site have  $p < 0.20$ .

```
> cutter <- 0.2
> onesig <- selectSignificant(bsite, alpha = cutter) & selectSignificant(btime,
+   alpha = cutter)
> sum(onesig)
```

```
[1] 3062
```

We can fit a BUM model to the interaction  $p$ -values associated with this subset of probes. We still get a fairly small number of genes, even with a 30% FDR.

```
> bp <- Bum(pvals$"DetMap:Time.point"[onesig])
> countSignificant(bp, alpha = 0.3)
```

```
[1] 25
```

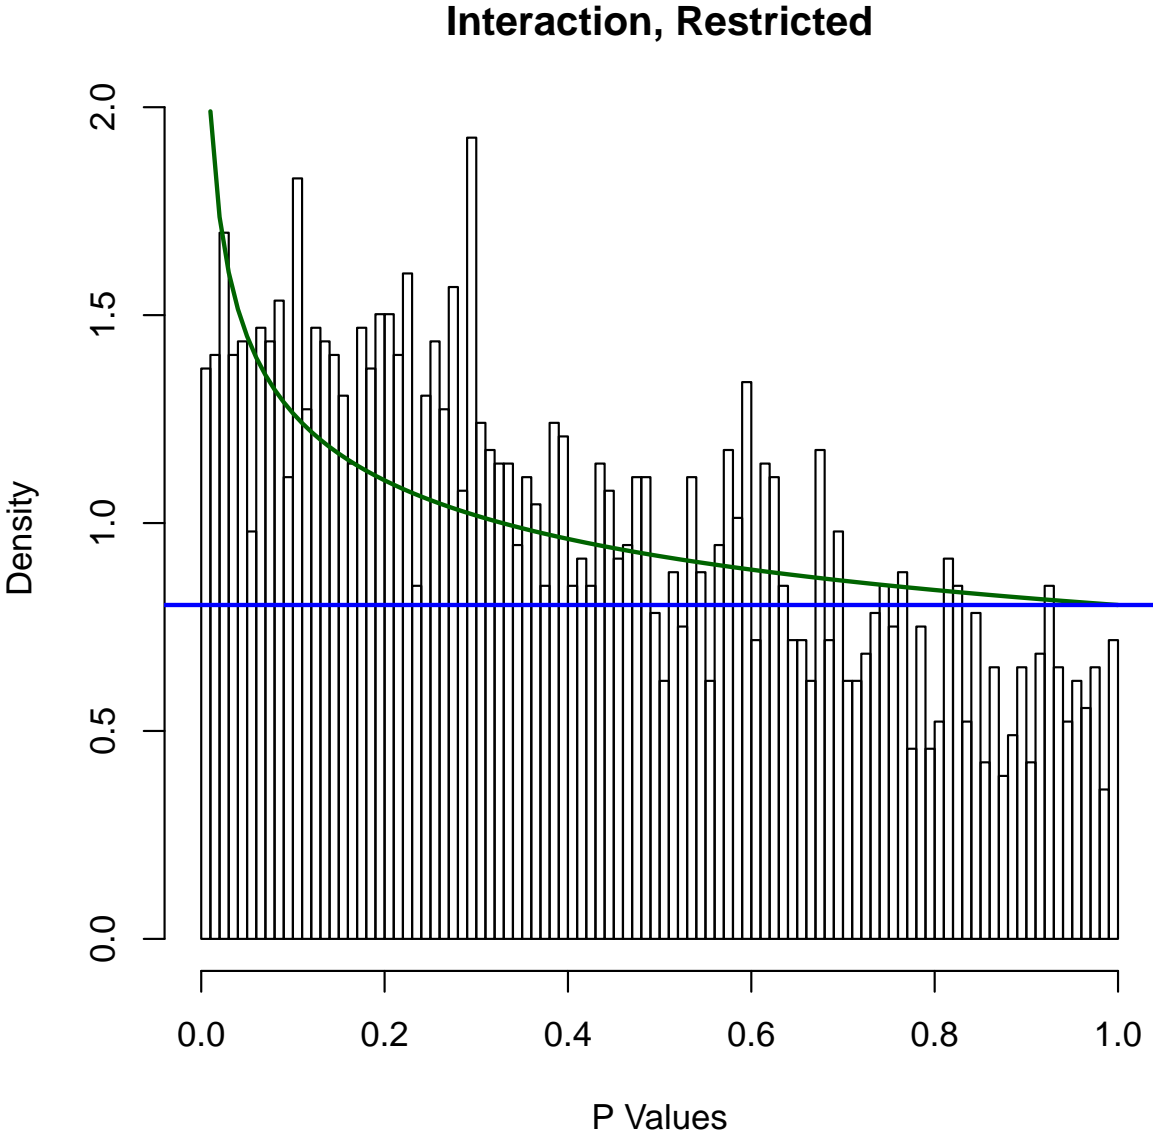

Figure 3: Histogram of  $p$ -values for the interaction between time and site, restricted to genes where both main effects show a trend toward significance.

### 3.3 Random Effects

In our model, we tried to fit a random intercept and a random slope (for trends over time) for each case. For some genes, we were unable to estimate all of these coefficients, and were forced to drop the slope terms for individual cases. The next block of code collects the indicators that separate genes into two categories depending on whether or not we could add the random-effects slopes into the model.

```
> ref <- unlist(lapply(modlist, function(x) {  
+   dim(ranef(x))[2]  
+ }))  
> table(ref)
```

```
ref  
  1    2  
7046 26206
```

We were able to include random-effects slopes for 26206 genes and were unable to do so for the remaining 7046 genes. A slightly larger percentage of fixed-effects time parameters are significant when we cannot fit a random slope model (**Figure 4**).

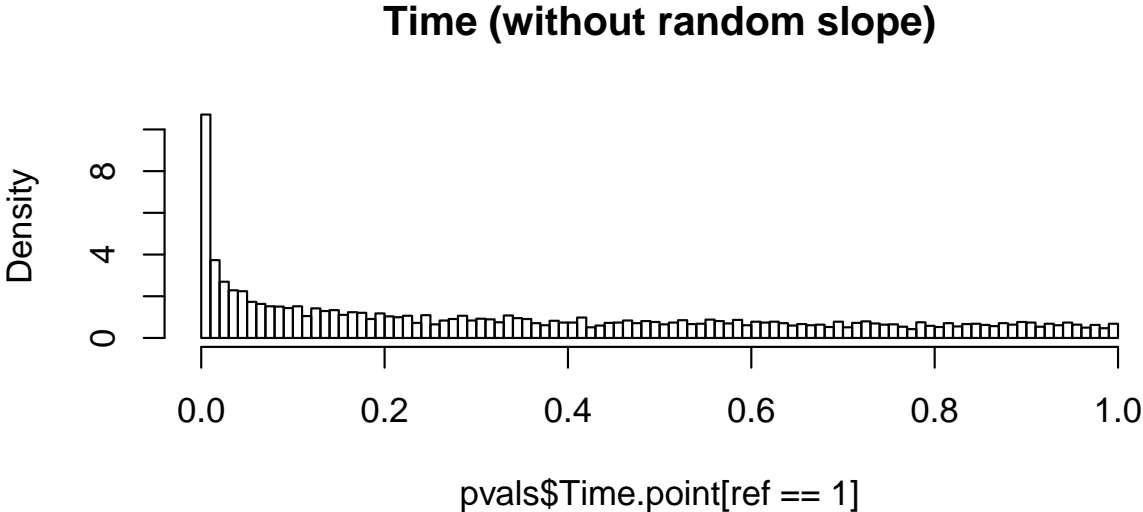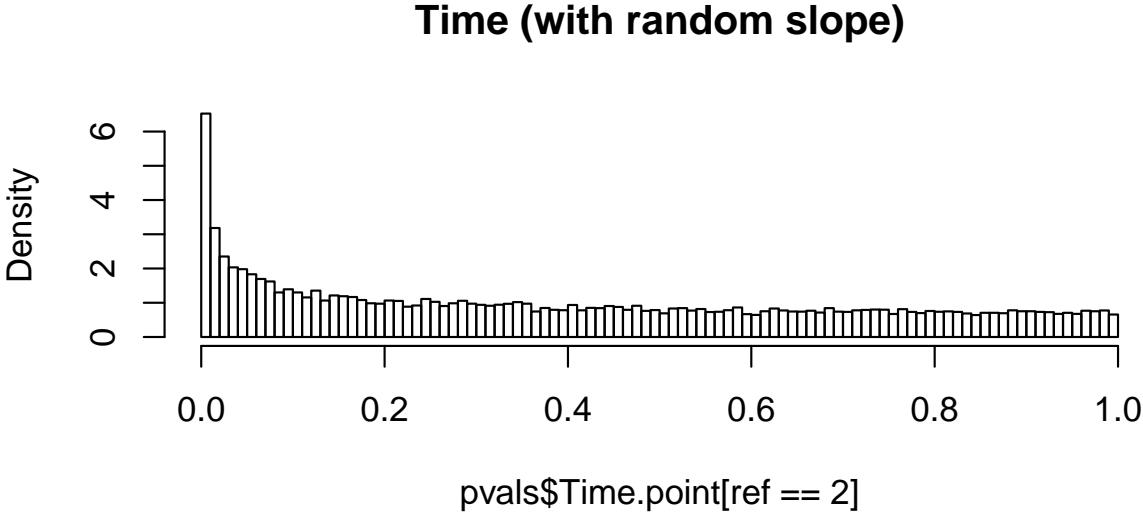

Figure 4: Histograms of the  $p$ -values for significant change over time depending on whether or not the model was able to fit different slopes for different patients.



## 4 Batch Correction

In order to generate additional plots, we need to adjust for the batch effects that are imposed on almost all genes. The information that we need to make this adjustment is already contained in the (fixed-effects) coefficients in the statistical models that we computed for each gene. For example,

```
> x <- modlist[[1]]
> fixef(x)
```

|                          |                     |                         |
|--------------------------|---------------------|-------------------------|
| (Intercept)              | BatchII             | DetMapNON-ADJ           |
| 6.115740148              | 0.291131961         | 0.079230372             |
| DetMapMC                 | DetMapCONTRA        | Time.point              |
| 0.117021531              | 0.430656803         | 0.287538998             |
| DetMapNON-ADJ:Time.point | DetMapMC:Time.point | DetMapCONTRA:Time.point |
| 0.003167197              | -0.071842053        | -0.250375185            |

The next block of code extracts all of the fixed-effects coefficients from the statistical models.

```
> f <- "fixcoef.rda"
> if (file.exists(f)) {
+   load(f)
+ } else {
+   fip <- lapply(modlist, fixef)
+   fixcoef <- matrix(unlist(fip), ncol = 9, byrow = TRUE)
+   colnames(fixcoef) <- names(fixef(x))
+   rownames(fixcoef) <- rownames(normData)
+   fixcoef <- as.data.frame(fixcoef)
+   rm(fip, x)
+   save(fixcoef, file = f)
+ }
> rm(f)
```

Now we use the batch coefficients to adjust the data.

```
> adjData <- normData
> temp <- sweep(adjData[, si$Batch == "I"], 1, fixcoef$BatchII, "+")
> adjData[, si$Batch == "I"] <- temp
```

### 4.1 Genes That Are Different By Site

We start by selecting the genes that are significantly different between sites, based on a 1% false discovery rate (FDR).

```
> ssel <- selectSignificant(bsite, alpha = 0.01)
> site.specific <- adjData[ssel, ]
```

Now we cluster the samples using these genes (**Figure 5**).

```
> ssc <- hclust(distanceMatrix(site.specific, "pearson"), "ward")
```

There are more “adjacent” samples in the left branch and more “main carina” and “contralateral” samples in the right branch of the dendrogram; this difference is statistically significant.

```
> table(cutree(ssc, k = 2))
```

```
 1  2
148 243
```

```
> tab.site <- table(cutree(ssc, k = 2), si$DetMap)
```

```
> tab.site
```

|   | ADJ | NON-ADJ | MC | CONTRA |
|---|-----|---------|----|--------|
| 1 | 35  | 44      | 19 | 49     |
| 2 | 27  | 63      | 41 | 112    |

```
> round(tab.site[1, ]/apply(tab.site, 2, sum) * 100, 1)
```

|  | ADJ  | NON-ADJ | MC   | CONTRA |
|--|------|---------|------|--------|
|  | 56.5 | 41.1    | 31.7 | 30.4   |

```
> fisher.test(tab.site)
```

Fisher's Exact Test for Count Data

```
data: tab.site
```

```
p-value = 0.002749
```

```
alternative hypothesis: two.sided
```

We also want to cluster the genes that differ between sites. With both genes and samples clustered, we can construct a heatmap (**Figure 6**). The patterns in the heatmap suggest that there are at least eight different gene expression patterns, which are indicated by the colorbar along the left side.

```
> ggc <- hclust(distanceMatrix(t(site.specific), "pearson"), "ward")
```

```
> scut <- cutree(ggc, k = 8)
```

```
> scut.colors <- brewer.pal(8, "Dark2")[scut]
```

```
> sclass <- as.numeric(ssel)
```

```
> sclass[ssel] <- scut
```

```
> table(sclass)
```

| sclass | 0     | 1   | 2  | 3   | 4   | 5  | 6   | 7   | 8  |
|--------|-------|-----|----|-----|-----|----|-----|-----|----|
|        | 32087 | 263 | 38 | 130 | 348 | 96 | 115 | 133 | 42 |

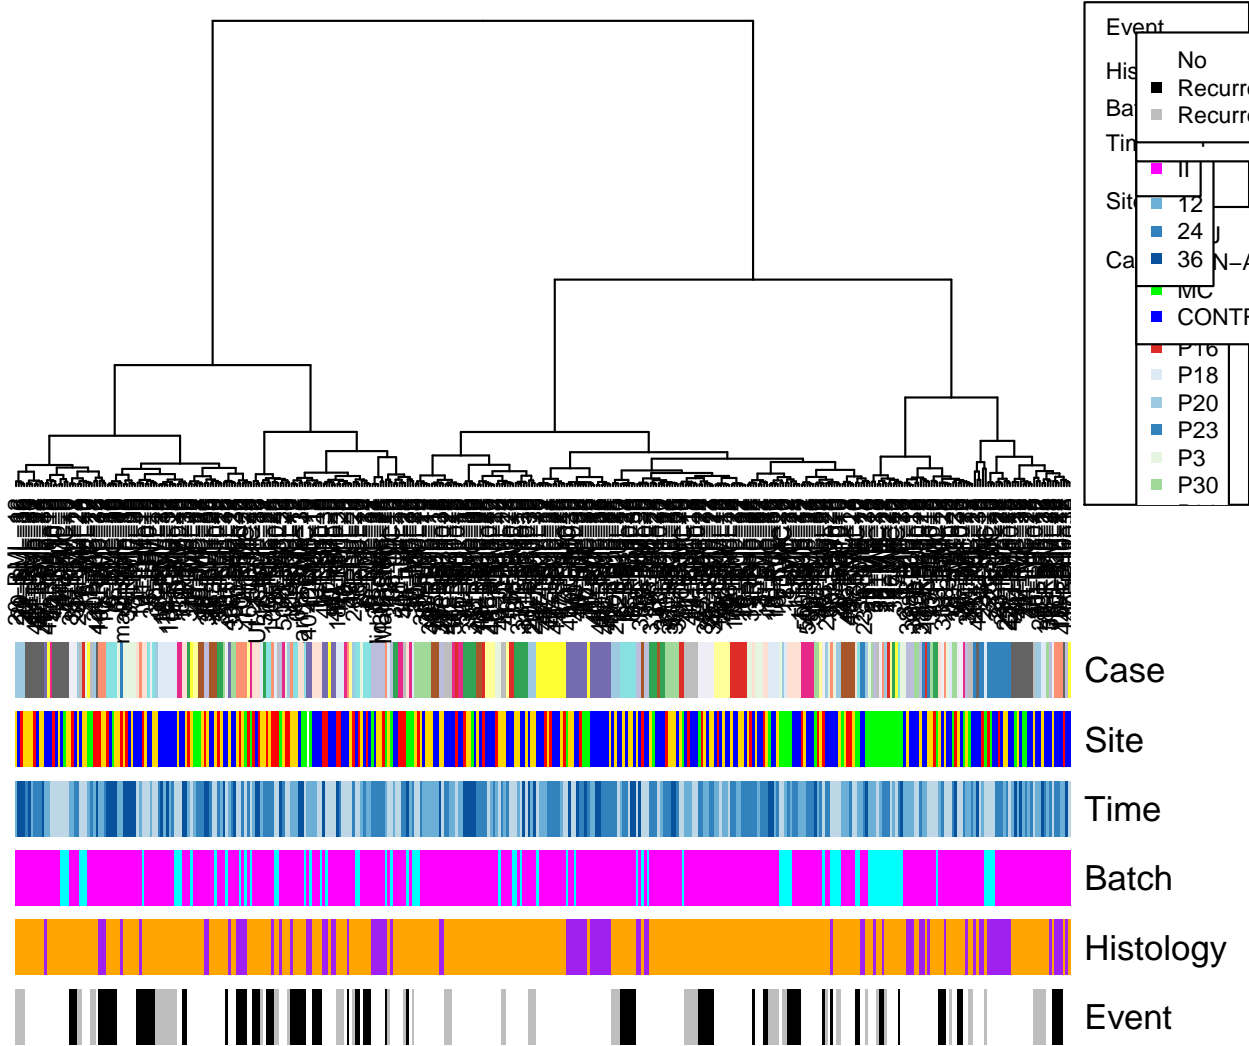

Figure 5: Hierarchical clustering of samples (using Pearson correlation and Ward’s linkage) based on genes that are significantly different between sites.

```
> ssite <- t(scale(t(site.specific)))  
> ssite[ssite > 5] <- 5  
> ssite[ssite < -5] <- -5
```

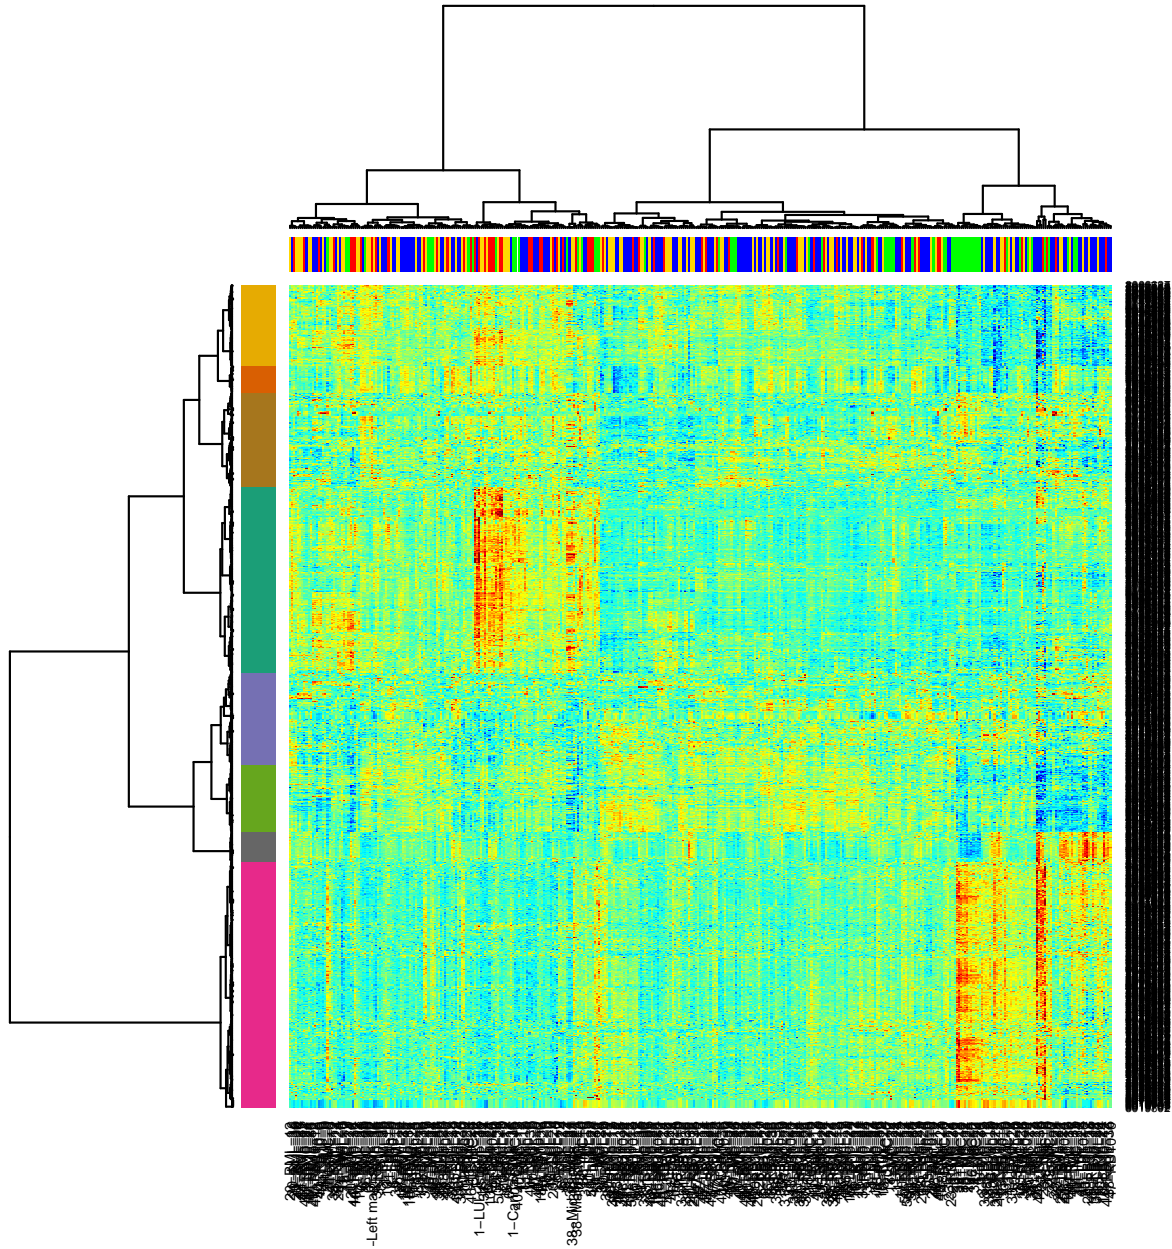

Figure 6: Two-dimensional clustering heatmap image of the genes selected because they differ by site. Top colorbar indicates site as in the previous plot. Left colorbar uses this clustering to define 8 types of gene expression patterns.

## 4.2 Genes That Change Over Time

In this section, we study genes that change (linearly) over time, regardless of the site. We start by selecting such genes with FDR equal to 5%.

```
> tsel <- selectSignificant(btime, alpha = 0.05)
> time.lapse <- adjData[tsel, ]
```

Next, we cluster the samples using these genes (**Figure 7**). The main branches are clearly unbalanced with respect to time; the starting time is much more likely to occur in the right-hand branch and the final time point is much more likely to appear in the left hand branch. In fact, over time, the samples seem to be moving from the right to the left branch.

```
> sc <- hclust(distanceMatrix(time.lapse, "pearson"), "ward")
> table(cutree(sc, k = 2))
```

```
 1  2
222 169
```

```
> tab.time <- table(cutree(sc, k = 2), si$Time.point)
> tab.time
```

```
  0 12 24 36
 1 45 56 70 51
 2 64 52 43 10
```

```
> round(tab.time[1, ]/apply(tab.time, 2, sum) * 100, 1)
```

```
  0  12  24  36
41.3 51.9 61.9 83.6
```

```
> fisher.test(tab.time)
```

Fisher's Exact Test for Count Data

```
data: tab.time
p-value = 4.146e-07
alternative hypothesis: two.sided
```

This effect becomes even more pronounced if we cut the tree slightly lower.

```
> table(cutree(sc, k = 3))
```

```
 1  2  3
222 124 45
```

```
> tab.time2 <- table(cutree(sc, k = 3), si$Time.point)
> tab.time2
```

```
   0 12 24 36
1  45 56 70 51
2  38 39 37 10
3  26 13  6  0
```

```
> chisq.test(tab.time2)
```

```
   Pearson's Chi-squared test
```

```
data:  tab.time2
```

```
X-squared = 44.1381, df = 6, p-value = 6.94e-08
```

We also want to cluster the genes that differ between time. With both genes and samples clustered, we can construct a heatmap (**Figure 8**). The patterns in the heatmap suggest that there are at least eight different gene expression patterns, which are indicated by the colorbar along the left side.

```
> gc <- hclust(distanceMatrix(t(time.lapse), "pearson"), "ward")
> tcut <- cutree(gc, k = 8)
> tcut.colors <- brewer.pal(8, "Dark2")[tcut]
> tclass <- as.numeric(tsel)
> tclass[tsel] <- tcut
> table(tclass)
```

```
tclass
```

```
   0    1    2    3    4    5    6    7    8
31857  53  159  183  258  259  94  219  170
```

```
> stime <- t(scale(t(time.lapse)))
> stime[stime > 5] <- 5
> stime[stime < -5] <- -5
```

Actually, we only find two real classes: the ones that show an increase (top branch in **Figure 8**) and the ones that show a decrease (bottom branch in **Figure 8**) over time.

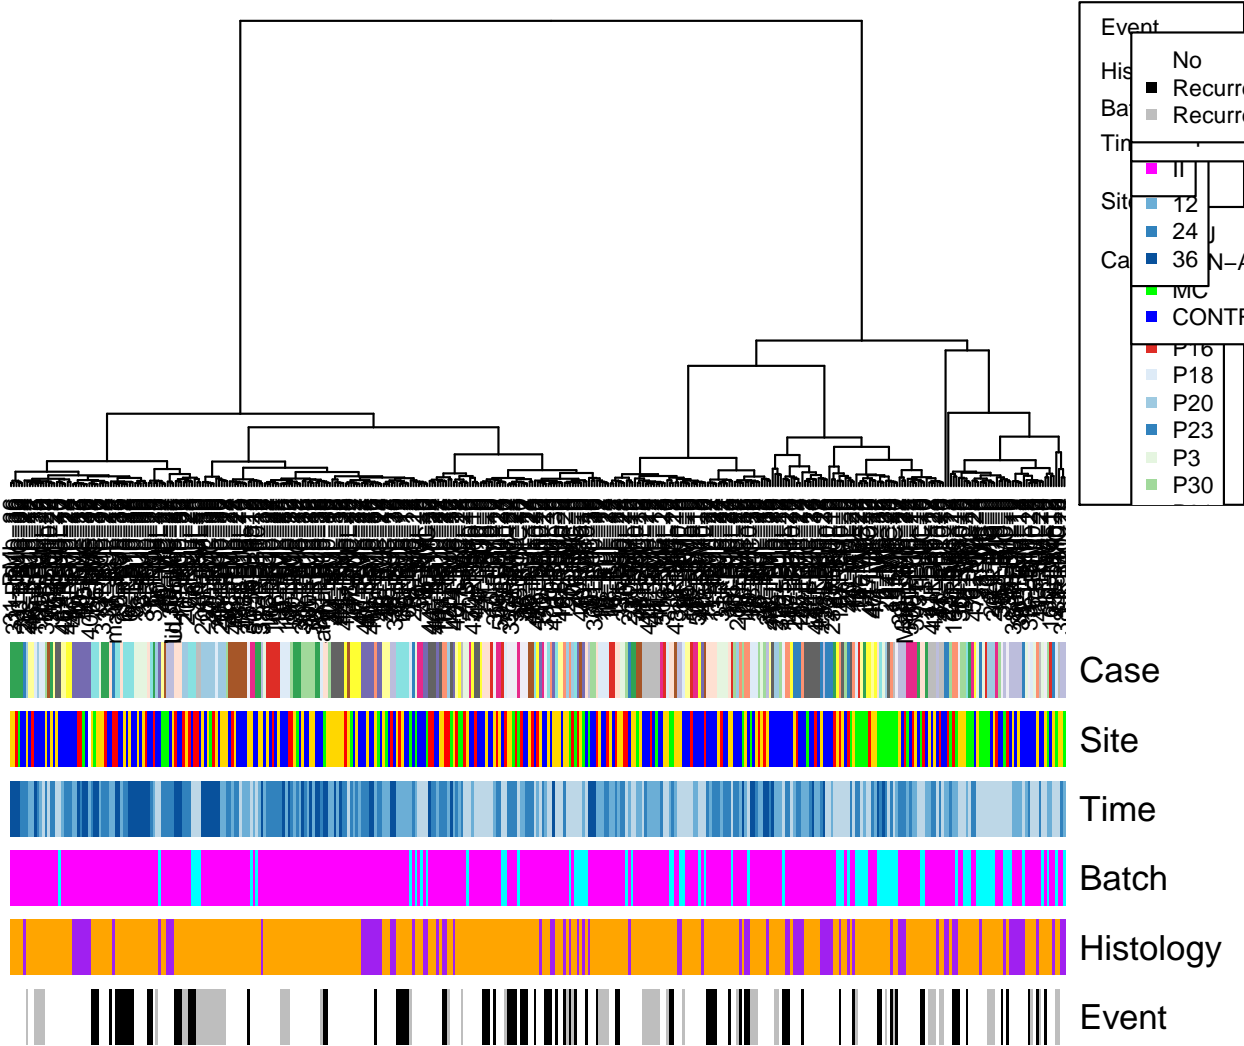

Figure 7: Hierarchical clustering of samples (using Pearson correlation and Ward's linkage) based on genes that are significantly different between **time points**.



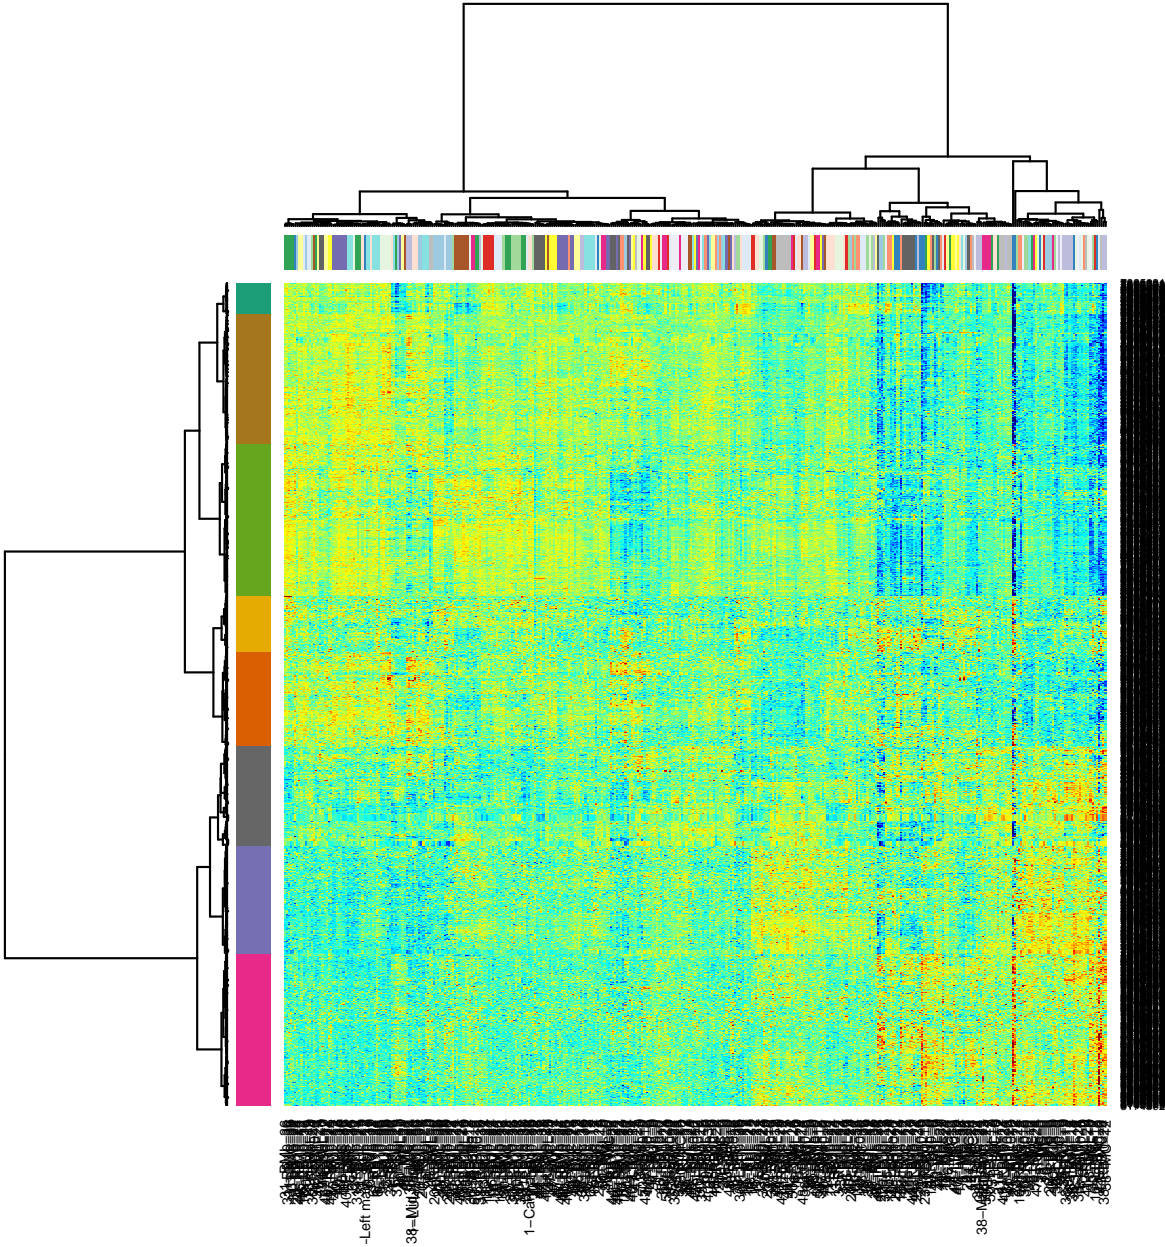

Figure 8: Two-dimensional clustering heatmap image of the genes selected because they differ by **time point**. Top colorbar indicates time, as in the previous plot. Left colorbar uses this clustering to define 8 types of gene expression patterns.

## Appendix

This analysis was run in the following directory:

```
> getwd()

[1] "o:/Lung-HN/KRC-Analyses"
```

Note that '/mdadqfs02/bioinfo2' is the standard institutional location for storing data and analyses; 'O:' is the name given to that location on this machine.

This analysis was run in the following software environment:

```
> sessionInfo()

R version 2.12.0 (2010-10-15)
Platform: x86_64-pc-mingw32/x64 (64-bit)

locale:
[1] LC_COLLATE=English_United States.1252  LC_CTYPE=English_United States.1252
[3] LC_MONETARY=English_United States.1252 LC_NUMERIC=C
[5] LC_TIME=English_United States.1252

attached base packages:
[1] splines      stats      graphics  grDevices  utils      datasets  methods    base

other attached packages:
[1] ClassDiscovery_2.10.2  mclust_3.4.8          cluster_1.13.1
[4] ClassComparison_2.12.0 PreProcess_2.10.1     oompaBase_2.12.0
[7] Biobase_2.10.0        RColorBrewer_1.0-2   lattice_0.19-13
[10] nlme_3.1-97

loaded via a namespace (and not attached):
[1] grid_2.12.0          KernSmooth_2.23-4
```
